## SHORT REPORT

# Prevalence of sarcopenia in community-dwelling older adults using the definition of the European Working Group on Sarcopenia in Older People 2: findings from the Korean Frailty and Aging Cohort Study

Miji KIM<sup>1</sup>, Chang Won Won<sup>2</sup>

<sup>1</sup>Department of Biomedical Science and Technology, College of Medicine, East-West Medical Research Institute, Kyung Hee University, Seoul, Korea

<sup>2</sup>Department of Family Medicine, College of Medicine, Kyung Hee University, Seoul, Korea

Address correspondence to: Chang Won Won, MD, PhD, Department of Family Medicine, College of Medicine, Kyung Hee University, 23, Kyung Hee Dae-ro, Dongdaemun-gu, Seoul, 02447, Korea. Tel: +82-2-958-8700; Fax: +82-2-958-8699; Email: [chunwon62@naver.com](mailto:chunwon62@naver.com)

---

## Abstract

**Background:** in October 2018, the European Working Group on Sarcopenia in Older People 2 (EWGSOP2) updated their original definition of sarcopenia to reflect the scientific and clinical evidence that has accumulated over the last decade.

**Objective:** to determine the prevalence of sarcopenia in a large group of community-dwelling older adults using the EWGSOP2 definition and algorithm.

**Design:** a cross-sectional study.

**Setting:** the nationwide Korean Frailty and Aging Cohort Study (KFACS).

**Subjects:** a total of 2,099 ambulatory community-dwelling older adults, aged 70–84 years (mean age,  $75.9 \pm 4.0$  years; 49.8% women) who were enrolled in the KFACS.

**Methods:** physical function was assessed by handgrip strength, usual gait speed, the five-times-sit-to-stand test, the timed up-and-go test, and the Short Physical Performance Battery. Appendicular skeletal muscle mass (ASM) was measured by dual-energy X-ray absorptiometry.

**Results:** according to the criteria of the EWGSOP2, the sarcopenia indicators of combined low muscle strength and low muscle quantity were present in 4.6–14.5% of men and 6.7–14.4% of women. The severe sarcopenia indicators of combined low muscle strength, low muscle quantity and low physical performance were present in 0.3–2.2% of men and 0.2–6.2% of women. Using the clinical algorithm with SARC-F as a screening tool, the prevalence of probable sarcopenia (2.2%), confirmed sarcopenia (1.4%) and severe sarcopenia (0.8%) was low.

**Conclusions:** the prevalence of sarcopenia among community-dwelling older individuals varied depending on which components of the revised EWGSOP2 definition were used, such as the tools used to measure muscle strength and the ASM indicators for low muscle mass.

## Keywords

Sarcopenia, muscle strength, physical function, European Working Group on Sarcopenia in Older People 2 (EWGSOP2), community-dwelling older individuals, older people

## Key points

- In October 2018, the European Working Group on Sarcopenia in Older People 2 (EWGSOP2) updated the clinical algorithm for identifying, diagnosing, and determining the severity of sarcopenia.
- Low muscle strength according to the grip strength and chair stand tests showed a significant difference between the sexes.
- Prevalence of sarcopenia and severe sarcopenia varied depending on which components of the revised EWGSOP2 definition were used.

## Introduction

Sarcopenia is a common condition among older individuals and is associated with adverse health outcomes [1]. A practical clinical definition and consensus diagnostic criteria for age-related sarcopenia were developed by the European Working Group on Sarcopenia in Older People (EWGSOP) based on the combination of appendicular skeletal muscle mass (ASM), muscle strength and physical performance [2]. Likewise, the International Working Group on Sarcopenia (IWGS) [3], Asia Working Group for Sarcopenia (AWGS) [4] and Foundation for the National Institutes of Health (FNIH) Sarcopenia Project [5] proposed defining sarcopenia as the loss of both ASM and muscle function. A systematic review reported that the estimated prevalence of sarcopenia varies from 9.9 to 40.4% depending on the definition used [6]. These differences in prevalence also exist across populations when using the same definition. The SARC-F was recently proposed as a simple and easy-to-use screening tool for sarcopenia [7]. The SARC-F has low-to-moderate sensitivity and high specificity based on the various definitions of sarcopenia used to screen for the condition among community-dwelling older adults [8, 9].

In October 2018, the EWGSOP2 updated the original definition of sarcopenia to reflect the scientific and clinical evidence that has accumulated over the last decade [10]. This updated definition of sarcopenia incorporates the following: low muscle strength as the first key determinant of diagnosis, new cut-off levels for the variables used to identify and characterise sarcopenia and advice on using the SARC-F questionnaire or clinical suspicion to assess sarcopenia-associated symptoms to identify individuals at risk of sarcopenia. Furthermore, the EWGSOP2 has proposed a clinical algorithm for identifying, diagnosing, and determining the severity of sarcopenia cases. Therefore, the aim of this study was to describe the prevalence of sarcopenia in a large group of community-dwelling older adults enrolled in the nationwide Korean Frailty and Aging Cohort Study (KFACS) using the EWGSOP2 definition and algorithm. A second objective was to compare the prevalence of sarcopenia between the EWGSOP2 and different sarcopenia definitions (EWGSOP1, AWGS, IWGS, and FNIH Sarcopenia Project).

## Methods

### Study population

KFACS is a nationwide multicenter longitudinal cohort study for which the baseline survey was conducted in 2016–17 [11]. Sex- and age-stratified community residents aged 70–84 years, drawn from urban and rural regions nationwide, were eligible for participation in the study. The recruitment of the study population is summarised in the Supplementary Methods. A total of 3,014 subjects participated in the baseline survey, 2,403 of whom underwent dual-energy X-ray absorptiometry (DEXA) in eight university hospital centres. In total, 611 subjects were excluded based on the results of the assessment of body composition by bioelectrical impedance analysis (BIA) at two community health centres because of the systematic bias of the appendicular lean mass between the BIA and DEXA measurements [12–14]. The final analysis included 2,099 subjects, after excluding 272 subjects who had artificial joints, pins, plates, metal suture materials or other types of metal objects in appendicular body regions (identified on DEXA images), and 32 subjects who had missing data for SARC-F and grip strength assessments, dementia, severe cognitive impairment, Parkinson's disease, or other neurological disorders. The KFACS protocol was approved by the institutional review board of the Clinical Research Ethics Committee of the Kyung Hee University Medical Center, and all subjects provided written informed consent (IRB number: 2015-12-103).

### Definitions of sarcopenia

The EWGSOP2 defined sarcopenia as low muscle strength and low muscle quantity, with or without low physical performance. These measurements are described in the Supplementary measurements. We defined sarcopenia according to five sets of international diagnostic criteria (Supplementary Table 1): those of the EWGSOP1 [2], EWGSOP2 [10], AWGS [4], IWGS [3] and FNIH Sarcopenia Project [5]. The Korean version of the SARC-F questionnaire consists of five questions [9]. A SARC-F score  $\geq 4$  is considered to indicate sarcopenia [7].

## Data analysis

The data analysis procedures are described in the Supplementary data analysis.

## Results

The prevalence of sarcopenia, rates of combined low muscle strength and low physical performance, and the ASM indicators for low muscle quantity according to the revised EWGSOP2 consensus, are summarised in Table 1. The sarcopenia indicators of combined low muscle strength and low muscle quantity were present in 4.6–14.5% of men and 6.7–14.4% of women. The severe sarcopenia indicators of combined low muscle strength, low muscle quantity and low physical performance were present in 0.3–2.2% of men and 0.2–6.2% of women. The prevalence of sarcopenia was increased to 14.4% using the ASM and 18.4% using ASM/height<sup>2</sup> (men: 13.9% using the ASM and 17.0% using the ASM/height<sup>2</sup>; women: 15.0% using the ASM and 19.8% using the ASM/height<sup>2</sup>) if an additional one of the two measures of muscle strength (grip strength and chair stand test) was applied. For all the KFACS participants, the prevalence of low muscle strength using the handgrip strength and chair stand test was 19.3% and 9.6%, respectively, in men and 11.9% and 20.0%, respectively, in women (Supplementary Figure 1A). For the participants who underwent DEXA, the prevalence of low muscle strength using the handgrip strength and chair stand test was 18.0% and 9.6%, respectively, in men and 10.1% and 19.4%, respectively, in women (Supplementary Figure 1B). The characteristics of participants who were excluded from the analyses are listed in Supplementary Tables 3 and 4. The prevalence of low muscle strength as measured by the handgrip test was higher in excluded participants residing in rural and suburban regions who underwent BIA to measure body composition (24.0% of men and 19.5% of women,  $P < 0.05$ ) than in those included in the analysis (17.2% of men and 10.1% of women). Low muscle strength (handgrip) was significantly more prevalent in men with metal implants in appendicular body regions (33.3%,  $P < 0.05$ ) excluded from the study than in the men included in the analysis. In contrast, we found no significant differences in muscle strength between women with and without metal implants in appendicular body regions. Moreover, men with metal implants were more likely to perform poorly on the chair stand test than those who underwent BIA to measure body composition and those who were included in the analysis ( $P < 0.05$ ). In contrast, chair stand test performance did not differ significantly among women with metal implants, those who underwent BIA, and those included in the analysis.

According to the algorithm using the SARC-F questionnaire as a screening tool proposed by the EWGSOP2, 2.2% ( $n = 47$ ), 1.4% ( $n = 30$ ) and 0.8% ( $n = 16$ ) of the study population were classified into the probable sarcopenia, confirmed sarcopenia and severe sarcopenia groups,

respectively (Supplementary Figure 2). The prevalence of sarcopenia and severe sarcopenia among participants who were SARC-F-positive and -negative is shown in Supplementary Figure 3. The sensitivity and specificity of the SARC-F questionnaire ( $\geq 4$  points) for sarcopenia screening based on the various definitions of the EWGSOP2 of sarcopenia (15.4–29.5% and 92.2–94.2%, respectively) and severe sarcopenia (42.2–100% and 93.0–94.5%, respectively) are listed in Supplementary Table 5. Based on the EWGSOP1, EWGSOP2, IWGS, AWGS and FNIH Sarcopenia Project, the prevalence of sarcopenia ranged from 8.4% to 25.5% in men and from 4.7% to 16.2% in women (Figure 1).

## Discussion

To our knowledge, this is the first study to evaluate the prevalence of sarcopenia among a large population of community-dwelling older adults using the diagnostic algorithm proposed by the EWGSOP2. In our study population, the prevalence of sarcopenia and severe sarcopenia varied depending on which components of the revised EWGSOP2 definition were used. More importantly, low muscle strength according to the results of grip strength and chair stand tests showed a significant difference between the sexes. Compared with low muscle quantity calculated using the height-adjusted ASM (47.9% of men and 62.2% of women), the prevalence of sarcopenia was higher when the absolute ASM (63.2% of men and 80.1% of women) was applied. This is concerning and may be due to differences in body size and anthropometric characteristics between Western and Asian populations. In this study, the prevalence of severe sarcopenia was lower using the timed up-and-go (TUG) test to assess physical performance, then when using gait speed and SPPB findings according to the revised EWGSOP2 definition.

The EWGSOP2 recommended the use of grip strength and chair stand measures to identify low muscle strength [10]. Low muscle strength is used for trigger assessment of causes and initiate intervention based on possible sarcopenia in clinical practice. In this study, the muscle strength values indicative of probable sarcopenia, according to the cutoffs set by the EWGSOP2, were significantly different between the sexes. For example, more women were classified as probable sarcopenic using the chair stand test, and more men were probably classified as sarcopenia applying the grip strength test. Moreover, the chair stand test was more likely to reveal low muscle strength in men with metal implants, who were excluded from the study, than in those included in the study. Only 73 participants (3.5%) had low muscle strength in both the handgrip strength and chair stand tests. In our study, women had a higher prevalence of osteoarthritis than men. Indeed, previous studies have reported that women are more likely than men to suffer from osteoarthritis [15–17]. Patsika *et al.* [18] reported that patients with knee osteoarthritis had poorer performance in chair stand tests due to less efficient use of knee extensor

**Table 1.** Prevalence of sarcopenia according to the method of measuring muscle strength and physical performance, and appendicular skeletal muscle mass indicators for muscle quantity (absolute ASM and height-adjusted ASM) established by the EWGSOP2.

| Variable                                                                                       | Overall ( <i>n</i> = 2,099) | Men ( <i>n</i> = 1,053) | Women ( <i>n</i> = 1,046) | <i>P</i> -value |
|------------------------------------------------------------------------------------------------|-----------------------------|-------------------------|---------------------------|-----------------|
| Age, years                                                                                     | 75.9 ± 4.0                  | 76.4 ± 3.9              | 75.4 ± 3.9                | 0.000           |
| Height, m <sup>2</sup>                                                                         | 158.4 ± 8.5                 | 164.9 ± 5.6             | 151.9 ± 5.3               | 0.000           |
| Weight, kg                                                                                     | 60.9 ± 9.4                  | 65.2 ± 9.0              | 56.6 ± 7.7                | 0.000           |
| BMI, kg/m <sup>2</sup>                                                                         | 24.2 ± 2.9                  | 23.9 ± 2.9              | 24.5 ± 2.8                | 0.000           |
| Number of comorbidities                                                                        | 1.6 ± 1.3                   | 1.4 ± 1.2               | 1.9 ± 1.3                 | 0.000           |
| ADL disability, %                                                                              | 32 (1.5)                    | 15 (1.4)                | 17 (1.5)                  | 0.422           |
| IADL disability, %                                                                             | 236 (11.2)                  | 132 (12.5)              | 104 (10.0)                | 0.037           |
| Osteoarthritis, %                                                                              | 416 (19.8)                  | 112 (10.6)              | 304 (29.1)                | 0.000           |
| Appendicular skeletal muscle mass (ASM), kg                                                    | 16.3 ± 3.7                  | 19.2 ± 2.7              | 13.4 ± 1.8                | 0.000           |
| ASM/height <sup>2</sup>                                                                        | 6.43 ± 0.99                 | 7.04 ± 0.86             | 5.82 ± 0.71               | 0.000           |
| ASM/BMI                                                                                        | 0.680 ± 0.156               | 0.806 ± 0.106           | 0.553 ± 0.075             | 0.000           |
| Handgrip strength, kg                                                                          | 26.8 ± 7.4                  | 32.4 ± 5.8              | 21.2 ± 3.9                | 0.000           |
| Five times sit to stand test, s                                                                | 11.2 ± 3.7                  | 10.6 ± 3.2              | 11.9 ± 4.1                | 0.000           |
| 4-m usual gait speed, m/s                                                                      | 1.13 ± 0.26                 | 1.17 ± 0.27             | 1.09 ± 0.24               | 0.000           |
| Timed up-and-go test (TUG), s                                                                  | 10.3 ± 2.5                  | 10.0 ± 2.3              | 10.5 ± 2.7                | 0.000           |
| Short Physical Performance Battery (SPPB), score                                               | 10.9 ± 1.5                  | 11.1 ± 1.3              | 10.7 ± 1.6                | 0.000           |
| <b>EWGSOP2</b>                                                                                 |                             |                         |                           |                 |
| <b>Low muscle strength, %</b>                                                                  |                             |                         |                           |                 |
| Handgrip strength (<27 kg in men and <16 kg in women)                                          | 287 (13.7)                  | 181 (17.2)              | 106 (10.1)                | 0.000           |
| Chair stand test (>15 s in men and women) <sup>a</sup>                                         | 286 (13.6)                  | 95 (9.0)                | 191 (18.3)                | 0.000           |
| Grip strength and/or chair stand test                                                          | 493 (23.5)                  | 241 (22.9)              | 252 (24.1)                | 0.537           |
| <b>Low muscle quantity, %</b>                                                                  |                             |                         |                           |                 |
| ASM (<20 kg in men and <15 kg in women)                                                        | 71.7 (71.7)                 | 666 (63.2)              | 838 (80.1)                | 0.000           |
| ASM/height <sup>2</sup> (<7.0 kg/m <sup>2</sup> in men and <6.0 kg/m <sup>2</sup> in women)    | 1158 (55.2)                 | 504 (47.9)              | 654 (62.2)                | 0.000           |
| <b>Low physical performance, %</b>                                                             |                             |                         |                           |                 |
| Gait speed (≤ 0.8 m/s in men and women)                                                        | 147 (7.0)                   | 56 (5.3)                | 91 (8.7)                  | 0.002           |
| SPPB score (≤ 8 points in men and women)                                                       | 140 (6.7)                   | 45 (4.3)                | 95 (9.1)                  | 0.000           |
| TUG test (≥ 20 s in men and women)                                                             | 18 (0.9)                    | 6 (0.6)                 | 12 (1.1)                  | 0.115           |
| Gait speed, SPPB, and/or TUG                                                                   | 207 (9.9%)                  | 74 (7.0)                | 133 (12.7)                | 0.000           |
| <b>SARC-F (≥ 4 points)</b>                                                                     |                             |                         |                           |                 |
| Sarcopenia, %                                                                                  | 152 (7.2)                   | 30 (2.8)                | 122 (11.7)                | 0.000           |
| <b>Sarcopenia, %</b>                                                                           |                             |                         |                           |                 |
| Grip strength + ASM                                                                            | 245 (11.7)                  | 153 (14.5)              | 92 (8.8)                  | 0.000           |
| Grip strength + ASM/height <sup>2</sup>                                                        | 195 (9.3)                   | 125 (11.9)              | 70 (6.7)                  | 0.000           |
| Chair stand test + ASM                                                                         | 207 (9.9)                   | 56 (5.3)                | 151 (14.4)                | 0.000           |
| Chair stand test + ASM/height <sup>2</sup>                                                     | 165 (7.9)                   | 48 (4.6)                | 117 (11.2)                | 0.000           |
| Grip strength and/or chair stand test + ASM                                                    | 303 (14.4)                  | 146 (13.9)              | 157 (15.0)                | 0.457           |
| Grip strength and/or chair stand test + ASM/height <sup>2</sup>                                | 386 (18.4)                  | 179 (17.0)              | 207 (19.8)                | 0.102           |
| <b>Severe sarcopenia, %</b>                                                                    |                             |                         |                           |                 |
| Grip strength + ASM + gait speed                                                               | 45 (2.1)                    | 23 (2.2)                | 22 (2.1)                  | 0.509           |
| Grip strength + ASM/height <sup>2</sup> + gait speed                                           | 37 (1.8)                    | 20 (1.9)                | 17 (1.6)                  | 0.378           |
| Chair stand test + ASM + gait speed                                                            | 59 (2.8)                    | 16 (1.5)                | 43 (4.1)                  | 0.000           |
| Chair stand test + ASM/height <sup>2</sup> + gait speed                                        | 47 (2.2)                    | 16 (1.5)                | 31 (3.0)                  | 0.018           |
| Grip strength + ASM + SPPB                                                                     | 47 (2.2)                    | 21 (2.0)                | 26 (2.5)                  | 0.270           |
| Grip strength + ASM/height <sup>2</sup> + SPPB                                                 | 38 (1.8)                    | 19 (1.8)                | 19 (1.8)                  | 0.557           |
| Chair stand + ASM + SPPB                                                                       | 86 (4.1)                    | 21 (2.0)                | 65 (6.2)                  | 0.000           |
| Chair stand + ASM/height <sup>2</sup> + SPPB                                                   | 68 (3.2)                    | 20 (1.9)                | 48 (4.6)                  | 0.000           |
| Grip strength + ASM + TUG                                                                      | 9 (0.4)                     | 4 (0.4)                 | 5 (0.5)                   | 0.496           |
| Grip strength + ASM/height <sup>2</sup> + TUG                                                  | 6 (0.3)                     | 4 (0.4)                 | 2 (0.2)                   | 0.347           |
| Chair stand + ASM + TUG                                                                        | 13 (0.6)                    | 3 (0.3)                 | 10 (1.0)                  | 0.044           |
| Chair stand + ASM/height <sup>2</sup> + TUG                                                    | 8 (0.4)                     | 3 (0.3)                 | 5 (0.4)                   | 0.359           |
| Grip strength and/or chair stand test + ASM + gait speed, SPPB, and/or TUG                     | 108 (5.1)                   | 34 (3.2)                | 74 (7.1)                  | 0.000           |
| Grip strength and/or chair stand test + ASM/height <sup>2</sup> + gait speed, SPPB, and/or TUG | 81 (3.9)                    | 29 (2.8)                | 52 (5.0)                  | 0.006           |

Values are means ± SD, *n* (%). ADL, activities of daily living; ASM, appendicular skeletal muscle mass; BMI, body mass index; IADL, instrumental activities of daily living; SARC-F, simple 5-item questionnaire for sarcopenia screening; SD, standard deviation; SPPB, short physical performance battery; TUG, timed up-and-go test. *P*-values are based on the Chi-square, Fisher's exact, and independent *t*-tests. Comorbidities were defined as a self-reported physician's diagnosis of hypertension, myocardial infarction, dyslipidemia, diabetes mellitus, congestive heart failure, angina pectoris, peripheral vascular disease, cerebrovascular disease, osteoarthritis, rheumatoid arthritis, osteoporosis, asthma or chronic obstructive pulmonary disease. <sup>a</sup>Included 15 participants who were unable to complete the chair stand test.

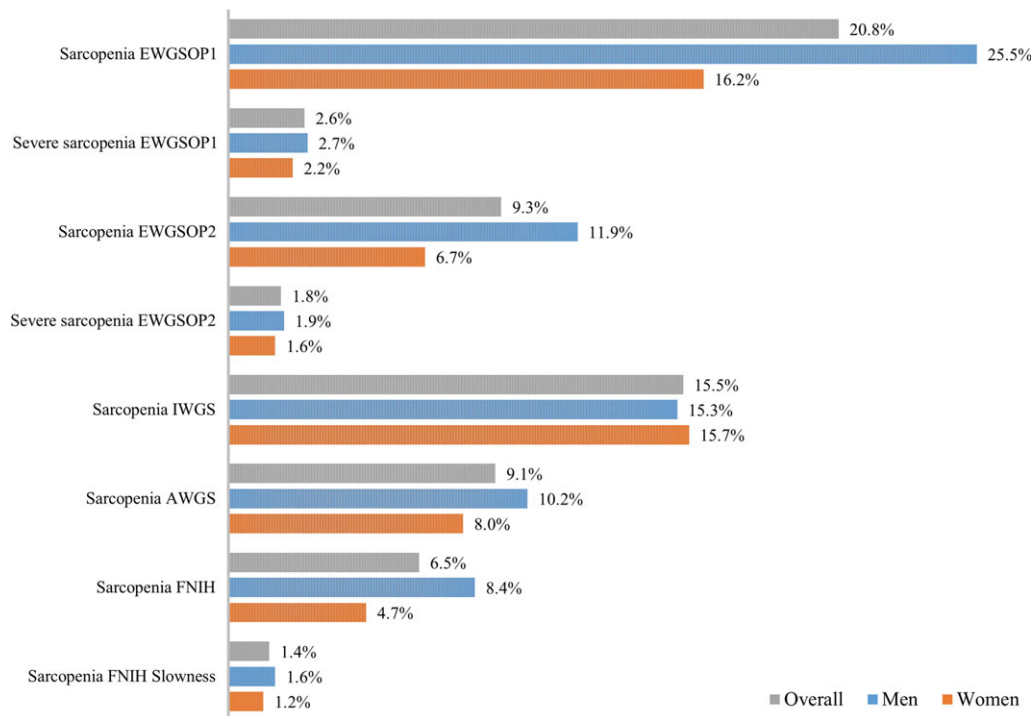

**Figure 1.** Prevalence (%) of sarcopenia according to diagnostic criteria. Sarcopenia was defined as low muscle strength (handgrip strength), low muscle mass (appendicular skeletal muscle mass [ASM] [kg]/height<sup>2</sup>) and/or low physical performance (gait speed). The prevalence of sarcopenia as defined by the EWGSOP1, EWGSOP2, and FNIH criteria was significantly different between men and women ( $P < 0.001$ ), with the exceptions of the prevalence of severe sarcopenia as defined by the EWGSOP1, EWGSOP2, AWGS and IWGS criteria, and the prevalence of sarcopenia as defined by slow gait speed in the FNIH Sarcopenia Project ( $P > 0.5$ ). AWGS, Asian Working Group for Sarcopenia; BMI, body mass index; EWGSOP, European Working Group on Sarcopenia in Older People; FNIH, Foundation for the National Institutes of Health; IWGS, International Working Group on Sarcopenia.

muscles. In this study, the rate of low muscle strength according to the chair stand test showed no significant difference between the sexes among the participants with metal implants in appendicular body regions (Supplementary Table S4). Therefore, older persons with musculoskeletal complaints, osteoarthritis and a history of fractures may score lower on chair stand tests. The revised EWGSOP2 definition specifies low muscle strength as the primary symptom of sarcopenia; muscle strength is currently the most reliable measure of muscle function given the technological limitations of assessing muscle mass [10]. In our study, 611 (20.2%) of 3,014 participants were excluded on the basis of the results of the body composition assessment by BIA in two community health centres in suburban or rural areas where they resided. Although the ages of the included and excluded patients were similar, the prevalence of low muscle strength as measured by the handgrip test was significantly higher in the excluded group. Gao *et al.* [19] reported that rural older adults had significantly lower handgrip strength than those residing in urban areas; moreover, the authors found that rural residence was an independent risk factor for sarcopenia. Therefore, in clinical settings that have limited access to techniques to assess muscle mass (e.g. DXA and regional body composition tools that recognise artificial joints, metal sutures, and metal objects), it is necessary to

use simple, valid methods to detect low muscle mass and quality as indicators of sarcopenia.

We found no significant differences between sexes using the EWGSOP1 (32.9% of men and 36.1% of women) and FNIH (12.5% of men and 10.1% of women) handgrip strength cutoffs (Supplementary Table S2). In addition, when the AWGS definition was applied, the prevalence of low handgrip strength was 12.5% in men and 19.4% in women ( $P < 0.001$ ). Therefore, sex differences in handgrip strength may be related to the sex-specific cut-offs used. Also, there was a significant univariate correlation between gait speed and TUG test performance ( $r = 0.59$ ,  $P < 0.001$ ). However, the revised EWGSOP2 definition using the TUG to assess low physical performance yielded the lowest prevalence. The EWGSOP2 proposed a cutoff of  $\geq 20$  s based on the data of community-dwelling and institutionalised older persons [20]. In addition, they suggested 12 s as a clinical cutoff for normal TUG test performance in community-dwelling older persons. Therefore, 12 s may be a useful cutoff point for normal mobility in community-dwelling individuals. In this study, the prevalence of low muscle mass was higher in men than in women for all five cut-off criteria. In general, body composition differs between the sexes; males have more lean mass and females have more fat mass [21].

We found that the prevalence of sarcopenia according to the clinical algorithm using the SARC-F as a screening tool proposed by the EWGSOP2 was 1.4%, and that of severe sarcopenia was 0.8%. A previous study demonstrated a high specificity for the SARC-F screening tool, making it useful for efficiently ruling out sarcopenia in clinical settings [8]. However, the SARC-F has a low-to-moderate sensitivity for sarcopenia screening in community-dwelling older adults, outpatients, and the long-term care population when used in conjunction with the various sarcopenia definitions [8, 9, 22–25]. The prevalence of sarcopenia was low in our cohort of ambulatory community-dwelling older adults assessed by the case-finding algorithm using the SARC-F as a screening tool. As it may be difficult to operationalise clinical suspicion to assess sarcopenia-associated symptoms, the case-finding algorithm may not be easily implemented in community research settings. As the SARC-F screening tool will primarily detect severe cases, the EWGSOP2 recommended that the SARC-F be used to introduce the assessment and treatment of sarcopenia into clinical practice [10].

We demonstrated that the prevalence of sarcopenia varied depending on which of the EWGSOP2 [10], EWGSOP1 [2], AWGS [4], IWGS [3] and FNIH Sarcopenia Project [5] criteria were used. The prevalence of sarcopenia was lower using the EWGSOP2 compared with the EWGSOP1 criteria [6, 26]. The prevalence of severe sarcopenia defined by the EWGSOP1 (2.6%), EWGSOP2 (1.8%), and slow gait speed definition of the FNIH Sarcopenia Project (1.4%) showed no significant difference between the sexes. The EWGSOP2 guidelines suggested that individuals at risk of sarcopenia can be identified using the SARC-F questionnaire or based on clinical suspicion of sarcopenia-associated symptoms. The EWGSOP2 also recommended further testing for sarcopenia among individuals with risk of sarcopenia. The strengths and limitations of our study are described in the Supplementary data.

In conclusion, the prevalence of sarcopenia among community-dwelling older individuals varied depending on which components of the revised EWGSOP2 definition were used; (e.g. the tools used to measure muscle strength and the ASM indicators for low muscle quantity). The prevalence of probable sarcopenia according to the results of grip strength and chair stand tests showed a significant difference between the sexes. Furthermore, the revised EWGSOP2 definition using the TUG to assess physical performance yielded the lowest prevalence of severe sarcopenia. Further research is necessary to explore the optimal cutoff levels and composite measures of the EWGSOP2 algorithm given the impact on adverse health outcomes and taking into account differences in ethnicity, lifestyle, and culture.

**Supplementary data** are available from the *Age and Ageing* website.

**Acknowledgements:** We are extremely grateful to the study participants and staff of the Korean Frailty and Aging Cohort Study for their cooperation.

**Declaration of Sources of Funding:** This research was supported by a grant from the Korea Health Technology R&D Project through the Korean Health Industry Development Institute, funded by the Ministry of Health and Welfare, Republic of Korea (grant number: HI15C3153).

**Declaration of Conflict of Interest:** The authors report no conflicts of interest.

## References

1. Marzetti E, Calvani R, Tosato M *et al.* Sarcopenia: an overview. *Aging Clin Exp Res* 2017; 29: 11–7.
2. Cruz-Jentoft AJ, Baeyens JP, Bauer JM *et al.* Sarcopenia: European consensus on definition and diagnosis: report of the European Working Group on Sarcopenia in Older People. *Age Ageing* 2010; 39: 412–23.
3. Fielding RA, Vellas B, Evans WJ *et al.* Sarcopenia: an undiagnosed condition in older adults. Current consensus definition: prevalence, etiology, and consequences. International working group on sarcopenia. *J Am Med Dir Assoc* 2011; 12: 249–56.
4. Chen LK, Liu LK, Woo J *et al.* Sarcopenia in Asia: consensus report of the asian working group for sarcopenia. *J Am Med Dir Assoc* 2014; 15: 95–101.
5. Studenski SA, Peters KW, Alley DE *et al.* The FNIH sarcopenia project: rationale, study description, conference recommendations, and final estimates. *J Gerontol A Biol Sci Med Sci* 2014; 69: 547–58.
6. Mayhew AJ, Amog K, Phillips S *et al.* The prevalence of sarcopenia in community-dwelling older adults, an exploration of differences between studies and within definitions: a systematic review and meta-analyses. *Age Ageing* 2018; 48: 48–56.
7. Malmstrom TK, Morley JE. SARC-F: a simple questionnaire to rapidly diagnose sarcopenia. *J Am Med Dir Assoc* 2013; 14: 531–2.
8. Bahat G, Yilmaz O, Kilic C *et al.* Performance of SARC-F in regard to sarcopenia definitions, muscle mass and functional measures. *J Nutr Health Aging* 2018; 22: 898–903.
9. Kim S, Kim M, Won CW. Validation of the Korean Version of the SARC-F Questionnaire to Assess Sarcopenia: Korean Frailty and Aging Cohort Study. *J Am Med Dir Assoc* 2018; 19: 40–5 e1.
10. Cruz-Jentoft AJ, Bahat G, Bauer J *et al.* Sarcopenia: revised European consensus on definition and diagnosis. *Age Ageing* 2019; 48: 16–31.
11. Won CW, Lee Y, Choi J *et al.* Starting construction of frailty cohort for elderly and intervention study. *Ann Geriatr Med Res* 2016; 20: 114–117.
12. Wingo BC, Barry VG, Ellis AC *et al.* Comparison of segmental body composition estimated by bioelectrical impedance analysis and dual-energy X-ray absorptiometry. *Clin Nutr ESPEN* 2018; 28: 141–7.
13. Kim M, Shinkai S, Murayama H *et al.* Comparison of segmental multifrequency bioelectrical impedance analysis with dual-energy X-ray absorptiometry for the assessment of body composition in a community-dwelling older population. *Geriatr Gerontol Int* 2015; 15: 1013–22.

14. Kim M, Kim H. Accuracy of segmental multi-frequency bio-electrical impedance analysis for assessing whole-body and appendicular fat mass and lean soft tissue mass in frail women aged 75 years and older. *Eur J Clin Nutr* 2013; 67: 395.
15. O'Connor MI. Sex differences in osteoarthritis of the hip and knee. *J Am Acad Orthop Surg* 2007; 15: S22–5.
16. Quintana JM, Arostegui I, Escobar A *et al.* Prevalence of knee and hip osteoarthritis and the appropriateness of joint replacement in an older population. *Arch Intern Med* 2008; 168: 1576–84.
17. Lee S, Kwon Y, Lee N *et al.* The prevalence of osteoarthritis and risk factors in the Korean Population: The Sixth Korea National Health and Nutrition Examination Survey (VI-1, 2013). *Korean J Fam Med* 2018; 40: 171.
18. Patsika G, Kellis E, Amiridis IG. Neuromuscular efficiency during sit to stand movement in women with knee osteoarthritis. *J Electromyogr Kinesiol* 2011; 21: 689–94.
19. Gao L, Jiang J, Yang M *et al.* Prevalence of sarcopenia and associated factors in Chinese community-dwelling elderly: comparison between rural and urban areas. *J Am Med Dir Assoc* 2015; 16: 1003.e1–6.
20. Bischoff HA, Stahelin HB, Monsch AU *et al.* Identifying a cut-off point for normal mobility: a comparison of the timed 'up and go' test in community-dwelling and institutionalised elderly women. *Age Ageing* 2003; 32: 315–20.
21. Bredella MA. Sex differences in body composition. *Adv Exp Med Biol* 2017; 1043: 9–27.
22. Woo J, Leung J, Morley JE. Defining sarcopenia in terms of incident adverse outcomes. *J Am Med Dir Assoc* 2015; 16: 247–52.
23. Kotlarczyk MP, Perera S, Nace DA *et al.* Identifying sarcopenia in female long-term care residents: a comparison of current guidelines. *J Am Geriatr Soc* 2018; 66: 316–20.
24. Woo J, Leung J, Morley JE. Validating the SARC-F: a suitable community screening tool for sarcopenia? *J Am Med Dir Assoc* 2014; 15: 630–4.
25. Ida S, Murata K, Nakadachi D *et al.* Development of a Japanese version of the SARC-F for diabetic patients: an examination of reliability and validity. *Aging Clin Exp Res* 2017; 29: 935–42.
26. Kim H, Hirano H, Edahiro A *et al.* Sarcopenia: prevalence and associated factors based on different suggested definitions in community-dwelling older adults. *Geriatr Gerontol Int* 2016; 16: 110–22.

**Received 13 November 2018; editorial decision 16 June 2019**
